# Supplementary material
Source: PubMed Central journal article supplement (PMC9381589)
Supplement: 41416_2022_1828_MOESM1_ESM.pdf [file 41416_2022_1828_MOESM1_ESM.pdf]

**Supplementary Appendix 1.** Patients' characteristics across cancer sites, 2010–2017

| Characteristics        | Lung           | Digestive     | Prostate       | Haematological | Primary sites | Colorectal   | Breast        | Urinary tract | Pancreatic   | FRO            | Other           | Total           |
|------------------------|----------------|---------------|----------------|----------------|---------------|--------------|---------------|---------------|--------------|----------------|-----------------|-----------------|
| <b>n, %</b>            |                |               |                |                |               |              |               |               |              |                |                 |                 |
| <b>Gender</b>          |                |               |                |                |               |              |               |               |              |                |                 |                 |
| Men                    | 2, 808 (54.36) | 2,524 (57.89) | 2,197 (100.00) | 1,127 (53.85)  | 805 (46.26)   | 858 (49.48)  | 11 (0.66)     | 1,016 (62.52) | 634 (45.84)  | 0 (0.00)       | 1,739 (58.22)   | 13,719 (52.61)  |
| Women                  | 2,358 (45.64)  | 1,836 (42.11) | 0 (0.00)       | 966 (46.15)    | 935 (53.74)   | 876 (50.52)  | 1,652 (99.34) | 609 (37.48)   | 749 (54.16)  | 1,129 (100.00) | 1,248 (41.78)   | 12,358 (47.39)  |
| <b>Age</b>             |                |               |                |                |               |              |               |               |              |                |                 |                 |
| 65-69                  | 436 (8.44)     | 233 (5.34)    | 66 (3.0)       | 114 (5.45)     | 111 (6.38)    | 80 (4.61)    | 97 (5.83)     | 89 (5.48)     | 92 (6.65)    | 86 (7.62)      | 209 (7.0)       | 1,613 (6.19)    |
| 70-79                  | 2,347 (45.4)   | 1,680 (38.53) | 681 (31.0)     | 747 (35.69)    | 587 (33.74)   | 564 (32.53)  | 563 (33.85)   | 511 (31.45)   | 588 (42.52)  | 475 (42.07)    | 1,150 (38.50)   | 9,893 (37.94)   |
| 80-89                  | 1,933 (37.42)  | 1,836 (42.11) | 1,017 (46.29)  | 939 (44.86)    | 730 (41.95)   | 779 (44.93)  | 638 (38.36)   | 728 (44.80)   | 548 (39.62)  | 423 (37.47)    | 1,196 (40.04)   | 10, 767 (41.29) |
| 90+                    | 450 (8.71)     | 611 (14.01)   | 433 (19.71)    | 293 (14.0)     | 312 (17.94)   | 311 (17.94)  | 365 (21.95)   | 297 (18.28)   | 155 (11.21)  | 145 (12.84)    | 432 (14.46)     | 3,804 (14.59)   |
| <b>Comorbidities</b>   |                |               |                |                |               |              |               |               |              |                |                 |                 |
| 0                      | 1,231 (23.83)  | 829 (19.01)   | 823 (37.46)    | 415 (19.83)    | 504 (28.97)   | 447 (25.78)  | 635 (38.18)   | 404 (24.86)   | 309 (22.34)  | 280 (24.80)    | 1032 (34.55)    | 6,909 (26.49)   |
| 1-3                    | 3,076 (59.54)  | 2,950 (67.66) | 1,000 (45.52)  | 1,565 (74.77)  | 396 (22.76)   | 982 (56.63)  | 520 (31.27)   | 987 (60.74)   | 908 (65.65)  | 562 (49.78)    | 1509 (50.52)    | 14, 445 (55.43) |
| 4-6                    | 316 (6.12)     | 269 (6.17)    | 145 (6.60)     | 67 (3.20)      | 637 (36.61)   | 118 (6.81)   | 242 (14.55)   | 95 (5.85)     | 74 (5.35)    | 88 (49.78)     | 210 (7.03)      | 2,261 (8.67)    |
| 7+                     | 543 (10.51)    | 312 (7.16)    | 229 (10.42)    | 46 (2.20)      | 203 (11.67)   | 187 (10.78)  | 266 (16.00)   | 139 (8.55)    | 92 (6.65)    | 199 (17.63)    | 236 (7.90)      | 2,452 (9.40)    |
| <b>IMD<sup>a</sup></b> |                |               |                |                |               |              |               |               |              |                |                 |                 |
| 1st (most deprived)    | 997 (19.30)    | 953 (21.86)   | 570 (25.94)    | 550 (26.28)    | 392 (22.53)   | 435 (25.09)  | 388 (23.33)   | 392 (24.12)   | 350 (25.31)  | 265 (23.47)    | 747 (25.01)     | 6,039 (23.16)   |
| 2nd                    | 993 (19.22)    | 972 (22.29)   | 532 (24.21)    | 492 (23.51)    | 388 (22.30)   | 379 (21.86)  | 394 (23.69)   | 372 (22.89)   | 309 (22.34)  | 259 (22.94)    | 716 (23.97)     | 5,806 (22.26)   |
| 3rd                    | 1,050 (20.33)  | 955 (21.90)   | 494 (22.49)    | 492 (23.51)    | 380 (21.84)   | 368 (21.22)  | 388 (23.33)   | 356 (21.91)   | 341 (24.66)  | 248 (21.97)    | 668 (22.36)     | 5,740 (22.01)   |
| 4th                    | 1,090 (21.10)  | 845 (19.38)   | 365 (16.61)    | 317 (15.5)     | 308 (17.70)   | 301 (17.36)  | 272 (16.36)   | 289 (17.78)   | 225 (16.27)  | 203 (17.98)    | 510 (17.07)     | 4,725 (18.12)   |
| 5th (least deprived)   | 1,036 (20.05)  | 635 (14.56)   | 236 (10.74)    | 242 (11.56)    | 272 (15.63)   | 251 (14.48)  | 221 (13.29)   | 216 (13.29)   | 158 (11.42)  | 154 (13.64)    | 346 (11.58)     | 3,767 (14.45)   |
| <b>Region</b>          |                |               |                |                |               |              |               |               |              |                |                 |                 |
| North East             | 109 (2.11)     | 57 (1.31)     | 33 (1.5)       | 33 (1.58)      | 25 (1.44)     | 25 (1.44)    | 23 (1.38)     | 27 (1.66)     | 25 (1.81)    | 11 (0.97)      | 52 (1.74)       | 420 (1.61)      |
| North West             | 1, 040 (20.13) | 715 (16.40)   | 275 (12.52)    | 273 (13.04)    | 278 (15.98)   | 255 (14.71)  | 215 (12.93)   | 254 (15.63)   | 173 (12.51)  | 138 (12.22)    | 421 (14.09)     | 4,037 (15.48)   |
| Yorkshire & The Humber | 137 (2.65)     | 103 (2.36)    | 47 (2.14)      | 53 82.53)      | 43 (2.47)     | 36 (2.08)    | 33 (1.98)     | 29 (1.78)     | 18 (1.30)    | 30 (2.66)      | 49 (1.64)       | 578 (2.22)      |
| West Midlands          | 607 (11.75)    | 621 (14.24)   | 300 (13.65)    | 274 (13.09)    | 228 (13.10)   | 224 (12.92)  | 200 (12.03)   | 207 (12.74)   | 175 (12.65)  | 162 (14.35)    | 361 (12.09)     | 3,359 (12.88)   |
| East of England        | 391 (7.57)     | 338 (7.75)    | 182 (8.28)     | 181 (8.65)     | 147 (8.45)    | 147 (8.48)   | 167 (10.04)   | 134 (8.25)    | 109 (7.88)   | 80 (7.09)      | 296 (9.91)      | 2,172 (8.33)    |
| South West             | 561 (10.86)    | 484 (11.10)   | 295 (13.43)    | 252 (12.04)    | 201 (11.55)   | 224 (12.92)  | 209 (12.57)   | 201 (12.37)   | 178 (12.87)  | 138 (12.22)    | 364 (12.19)     | 3,107 (11.91)   |
| South Central          | 767 (14.85)    | 686 (15.73)   | 362 (16.48)    | 352 (16.82)    | 287 (16.49)   | 279 (16.09)  | 271 (16.30)   | 274 (16.86)   | 237 (17.14)  | 205 (18.16)    | 504 (16.87)     | 4,224 (16.20)   |
| London                 | 583 (11.29)    | 485 (11.12)   | 239 (10.88)    | 244 (11.66)    | 207 (11.90)   | 173 (9.98)   | 175 (10.52)   | 148 (9.11)    | 159 (11.50)  | 139 (12.31)    | 330 (11.05)     | 2,882 (11.05)   |
| South East Coast       | 971 (18.80)    | 871 (19.98)   | 464 (21.12)    | 431 (20.59)    | 324 (18.62)   | 371 (21.40)  | 370 (22.25)   | 351 (21.60)   | 309 (22.34)  | 226 (20.02)    | 610 (20.42)     | 5,298 (20.32)   |
| Total                  | 5,166 (19.81)  | 4,360 (16.72) | 2,197 (8.43)   | 2,093 (8.03)   | 1,740 (6.67)  | 1,734 (6.65) | 1,663 (6.38)  | 1,625 (6.23)  | 1,383 (5.30) | 1,129 (100.00) | 2, 987 (100.00) | 26,077 (100.00) |

FRO = female reproductive organs; IMD = Index of Multiple Deprivation

**Supplementary Appendix 2. Health Care Utilization in the Last Year of Life for cancer decedents (2010-2017)**

| Health care utilisation mean (SD) | All cancers | Lung        | Digestive   | Prostate    | Haematological | Primary site | Colorectal  | Breast      | UT          | Pancreatic  | FRO         | Other cancers |
|-----------------------------------|-------------|-------------|-------------|-------------|----------------|--------------|-------------|-------------|-------------|-------------|-------------|---------------|
| <b>Last 12 months of life</b>     |             |             |             |             |                |              |             |             |             |             |             |               |
| Inpatient care                    |             |             |             |             |                |              |             |             |             |             |             |               |
| Hospital admissions               | 3.7 (5.8)   | 3.1 (4.1)   | 3.7 (4.5)   | 3.4 (4.7)   | 7.2 (10.8)     | 2.4 (4.4)    | 3.5 (4.6)   | 3.4 (5.0)   | 3.8 (7.5)   | 3.6 (4.7)   | 4.4 (5.4)   | 3.7 (6.4)     |
| LOS (total in days)               | 25.3 (27.7) | 21.0 (26.2) | 25.3 (27.3) | 26.6 (28.9) | 36.7 (33.0)    | 21.3 (23.0)  | 23.9 (25.9) | 20.7 (23.7) | 31.5 (30.9) | 22.2 (21.7) | 26.8 (26.0) | 27.3 (29.2)   |
| Intensive care (ICU)              |             |             |             |             |                |              |             |             |             |             |             |               |
| ICU admissions                    | 1.0 (0.2)   | 1.0 (0.2)   | 1.0 (0.2)   | 1.0 (0.2)   | 1.0 (0.1)      | 1.0 (0.3)    | 1.0 (0.2)   | 1.0 (0.2)   | 1.0 (0.1)   | 1.0 (0.1)   | 1 (0)       | 1.0 (0.2)     |
| ICU LOS                           | 5.7 (7.3)   | 6.7 (9.9)   | 5.9 (7.1)   | 4.6 (4.4)   | 5.7 (5.1)      | 6.5 (10.7)   | 5.3 (5.4)   | 4.8 (4.7)   | 5.7 (7.0)   | 5.5 (5.0)   | 5.3 (12.4)  | 5.2 (6.6)     |
| Emergency room                    |             |             |             |             |                |              |             |             |             |             |             |               |
| ER visits                         | 1.7 (1.6)   | 1.7 (1.7)   | 1.6 (1.6)   | 2.0 (1.9)   | 1.8 (1.7)      | 1.4 (1.4)    | 1.5 (1.5)   | 1.4 (1.5)   | 1.9 (1.8)   | 1.5 (1.5)   | 1.6 (1.5)   | 1.7 (1.7)     |
| Outpatient care                   |             |             |             |             |                |              |             |             |             |             |             |               |
| Outpatient attendances            | 9.1 (14.2)  | 9.2 (17.3)  | 8.5 (12.6)  | 9.3 (13.4)  | 12.0 (14.4)    | 6.5 (13.8)   | 8.5 (15.9)  | 9.2 (12.3)  | 8.9 (11.8)  | 7.2 (9.8)   | 10.1 (13.9) | 10.6 (13.5)   |
| <b>Last 90 days of life</b>       |             |             |             |             |                |              |             |             |             |             |             |               |
| Inpatient care                    |             |             |             |             |                |              |             |             |             |             |             |               |
| Hospital admissions               | 1.5 (1.9)   | 1.5 (1.8)   | 1.5 (1.6)   | 1.3 (1.4)   | 2.8 (3.4)      | 1.3 (1.3)    | 1.3 (1.5)   | 1.2 (1.5)   | 1.5 (2.2)   | 1.6 (1.6)   | 1.5 (1.6)   | 1.5 (2.0)     |
| LOS (total in days)               | 14.2 (16.3) | 13.4 (16.7) | 13.6 (15.7) | 13.5 (16.3) | 20.1 (18.3)    | 14.5 (15.1)  | 12.0 (14.9) | 11.2 (14.9) | 16.5 (17.4) | 13.2 (13.8) | 14.8 (15.9) | 14.4 (16.8)   |
| Intensive care (ICU)              |             |             |             |             |                |              |             |             |             |             |             |               |
| ICU admissions                    | 1.0 (0.2)   | 1.0 (0.2)   | 1.1 (0.2)   | 1.0 (0.2)   | 1.0 (0.1)      | 1.0 (0.3)    | 1.0 (0.3)   | 1.0 (0.2)   | 1.0 (1.1)   | 1.0 (1.2)   | 1.0 (0)     | 1.0 (0.2)     |
| ICU LOS                           | 6.1 (7.0)   | 7.1 (9.0)   | 6.1 (7.6)   | 5.3 (4.7)   | 5.9 (5.4)      | 6.9 (12.5)   | 6.1 (6.4)   | 5.6 (5.4)   | 6.1 (6.3)   | 6.3 (6.0)   | 3.8 (2.5)   | 5.8 (6.5)     |
| Emergency room                    |             |             |             |             |                |              |             |             |             |             |             |               |
| ER visits                         | 0.9 (0.9)   | 0.9 (1.0)   | 0.8 (0.9)   | 0.9 (1.0)   | 1.0 (1.0)      | 0.9 (0.9)    | 0.7 (0.9)   | 0.7 (0.9)   | 0.9 (1.0)   | 0.8 (0.9)   | 0.8 (0.8)   | 0.8 (0.9)     |
| Outpatient care                   |             |             |             |             |                |              |             |             |             |             |             |               |
| Outpatient attendances            | 2.8 (5.8)   | 3.2 (6.4)   | 2.6 (6.0)   | 2.6 (5.3)   | 3.7 (5.6)      | 2.3 (5.6)    | 2.4 (6.9)   | 2.7 (5.2)   | 2.8 (5.2)   | 2.3 (3.9)   | 2.7 (5.1)   | 3.1 (5.8)     |
| <b>Last 30 days of life</b>       |             |             |             |             |                |              |             |             |             |             |             |               |
| Inpatient care                    |             |             |             |             |                |              |             |             |             |             |             |               |
| Hospital admissions               | 0.6 (0.9)   | 0.7 (1.2)   | 0.6 (0.8)   | 0.5 (0.7)   | 1.0 (1.3)      | 0.7 (0.7)    | 0.5 (0.7)   | 0.5 (0.7)   | 0.5 (0.8)   | 0.6 (0.9)   | 0.5 (0.7)   | 0.6 (0.8)     |

|                        |           |            |           |           |           |           |           |           |           |           |           |           |
|------------------------|-----------|------------|-----------|-----------|-----------|-----------|-----------|-----------|-----------|-----------|-----------|-----------|
| LOS (total in days)    | 5.4 (8.7) | 5.8 (11.6) | 5.1 (7.5) | 4.5 (7.2) | 7.6 (9.7) | 6.6 (8.2) | 4.5 (7.3) | 4.1 (7.0) | 5.4 (7.9) | 5.4 (7.4) | 5.2 (7.9) | 4.9 (7.5) |
| Intensive care (ICU)   |           |            |           |           |           |           |           |           |           |           |           |           |
| ICU admissions         | 1.0 (0.2) | 1.0 (0.3)  | 1.0 (0.3) | 1.0 (0.3) | 1.0 (0.1) | 1.0 (0.3) | 1.0 (0.2) | 1.0 (0.0) | 1.0 (0.2) | 1.0 (0.2) | 1.0 (0.0) | 1.0 (0.2) |
| ICU LOS                | 5.8 (5.0) | 7.0 (6.3)  | 5.9 (5.3) | 4.9 (5.6) | 5.6 (4.2) | 5.3 (4.0) | 5.2 (4.0) | 5.9 (6.2) | 4.7 (3.0) | 6.7 (6.7) | 3.2 (1.4) | 6.0 (5.1) |
| Emergency room         |           |            |           |           |           |           |           |           |           |           |           |           |
| ER visits              | 0.4 (0.6) | 0.5 (0.6)  | 0.4 (0.6) | 0.4 (0.6) | 0.5 (0.6) | 0.5 (0.6) | 0.3 (0.6) | 0.3 (0.5) | 0.4 (0.6) | 0.4 (0.6) | 0.3 (0.5) | 0.4 (0.6) |
| Outpatient care        |           |            |           |           |           |           |           |           |           |           |           |           |
| Outpatient attendances | 0.9 (0.3) | 1.1 (3.7)  | 0.8 (3.4) | 0.8 (2.8) | 1.1 (2.8) | 0.8 (2.3) | 0.8 (3.4) | 0.8 (2.3) | 0.9 (3.0) | 0.7 (2.2) | 0.8 (2.9) | 0.8 (3.0) |

Abbreviations: UT = urinary tract; FRO = female reproductive organs; ICU = Intensive Care Unit, LOS = length of stay; ER: emergency room

**Supplementary Appendix 3. Primary Care Utilization in the Last Year of Life for cancer decedents (2010-2017)**

| <b>Primary care contacts, mean (SD)</b> | <b>All cancers</b> | <b>Lung</b> | <b>Digestive</b> | <b>Prostate</b> | <b>Haematological</b> | <b>Primary site</b> | <b>Colorectal</b> | <b>Breast</b> | <b>Urinary tract</b> | <b>Pancreatic</b> | <b>FRO</b>  | <b>Other cancers</b> |
|-----------------------------------------|--------------------|-------------|------------------|-----------------|-----------------------|---------------------|-------------------|---------------|----------------------|-------------------|-------------|----------------------|
| <b>Last 12 months of life</b>           |                    |             |                  |                 |                       |                     |                   |               |                      |                   |             |                      |
| GP consultations                        | 26.8 (18.8)        | 26.2 (17.8) | 26.6 (18.3)      | 30.8 (20.7)     | 27.8 (19.4)           | 22.6 (17.0)         | 26.1 (19.0)       | 25.0 (18.5)   | 28.0 (19.5)          | 26.9 (18.5)       | 27.8 (18.7) | 27.5 (18.9)          |
| Telephone consultations                 | 2.8 (4.6)          | 2.6 (4.5)   | 2.8 (4.9)        | 3.4 (5.4)       | 2.5 (4.4)             | 2.5 (4.2)           | 2.8 (4.7)         | 2.6 (4.2)     | 3.3 (5.1)            | 2.9 (4.5)         | 3.2 (5.0)   | 2.6 (4.4)            |
| Home visits                             | 1.9 (4.5)          | 1.8 (5.1)   | 1.9 (4.0)        | 2.6 (4.9)       | 1.5 (3.4)             | 1.6 (3.2)           | 2.2 (5.4)         | 2.4 (4.8)     | 2.2 (4.8)            | 1.5 (2.8)         | 2.1 (3.9)   | 2.0 (4.7)            |
| Out-of-hours                            | 0.8 (1.9)          | 0.8 (1.6)   | 0.8 (1.7)        | 1.3 (2.6)       | 0.7 (1.5)             | 0.7 (1.6)           | 0.9 (1.9)         | 0.8 (1.8)     | 1.2 (2.2)            | 0.9 (1.6)         | 1.0 (1.9)   | 0.8 (1.7)            |
| Medications                             | 76.4 (81.9)        | 78.1 (81.4) | 76.4 (86.2)      | 86.3 (83.9)     | 66.5 (77.1)           | 70.6 (77.0)         | 75.7 (82.6)       | 84.7 (92.2)   | 76.9 (81.3)          | 73.9 (81.9)       | 74.7 (73.6) | 73.9 (78.8)          |
| <b>Last 90 days of life</b>             |                    |             |                  |                 |                       |                     |                   |               |                      |                   |             |                      |
| GP consultations                        | 10.3 (7.5)         | 10.7 (7.4)  | 10.4 (7.7)       | 10.4 (7.6)      | 9.5 (7.0)             | 9.7 (7.3)           | 9.9 (7.5)         | 9.3 (7.1)     | 10.3 (7.8)           | 11.4 (7.7)        | 10.5 (7.6)  | 10.3 (7.6)           |
| Telephone consultations                 | 1.3 (2.3)          | 1.2 (2.1)   | 1.3 (2.2)        | 1.4 (2.5)       | 1.1 (2.1)             | 1.3 (2.3)           | 1.3 (2.4)         | 1.1 (2.2)     | 1.4 (2.5)            | 1.5 (2.4)         | 1.4 (2.4)   | 1.2 (2.2)            |
| Home visits                             | 1.2 (2.4)          | 1.0 (2.1)   | 1.2 (2.3)        | 1.4 (2.8)       | 0.8 (1.9)             | 1.1 (2.1)           | 1.2 (2.4)         | 1.2 (2.5)     | 1.2 (2.7)            | 1.0 (2.0)         | 1.3 (2.2)   | 1.2 (2.7)            |
| Out-of-hours                            | 0.6 (1.2)          | 0.5 (1.2)   | 0.5 (1.2)        | 0.7 (1.6)       | 0.4 (0.9)             | 0.5 (1.0)           | 0.6 (1.2)         | 0.5 (1.2)     | 0.7 (1.5)            | 0.6 (1.3)         | 0.6 (1.3)   | 0.5 (1.1)            |
| Medications                             | 24.1 (25.6)        | 25.8 (26.2) | 23.8 (25.7)      | 26.3 (26.4)     | 18.9 (24.3)           | 22.2 (23.8)         | 23.9 (24.7)       | 25.8 (27.5)   | 23.8 (25.7)          | 24.7 (25.1)       | 24.0 (23.7) | 23.7 (25.2)          |
| <b>Last 30 days of life</b>             |                    |             |                  |                 |                       |                     |                   |               |                      |                   |             |                      |
| GP consultations                        | 4.3 (3.6)          | 4.5 (3.5)   | 4.3 (3.5)        | 4.1 (3.6)       | 3.8 (3.4)             | 4.3 (3.6)           | 4.2 (3.6)         | 3.8 (3.4)     | 4.2 (3.7)            | 4.9 (3.7)         | 4.3 (3.6)   | 4.1 (3.6)            |
| Telephone consultations                 | 0.5 (1.1)          | 0.5 (1.1)   | 0.5 (1.1)        | 0.5 (1.1)       | 0.4 (1.1)             | 0.6 (1.2)           | 0.6 (1.2)         | 0.5 (1.1)     | 0.5 (1.2)            | 0.6 (1.3)         | 0.6 (1.2)   | 0.5 (1.1)            |
| Home visits                             | 0.6 (1.3)          | 0.6 (1.2)   | 0.6 (1.3)        | 0.7 (1.5)       | 0.4 (1.1)             | 0.6 (1.4)           | 0.7 (1.5)         | 0.6 (1.4)     | 0.6 (1.5)            | 0.6 (1.3)         | 0.7 (1.3)   | 0.6 (1.4)            |
| Out-of-hours                            | 0.3 (0.8)          | 0.3 (0.7)   | 0.3 (0.8)        | 0.4 (0.9)       | 0.3 (0.7)             | 0.3 (0.8)           | 0.4 (0.9)         | 0.3 (0.8)     | 0.4 (0.9)            | 0.4 (0.8)         | 0.4 (0.9)   | 0.3 (0.8)            |
| Medications                             | 8.9 (10.9)         | 9.7 (11.3)  | 8.9 (11.0)       | 9.5 (11.5)      | 6.7 (10.2)            | 8.0 (9.9)           | 9.3 (11.0)        | 9.3 (11.3)    | 8.7 (11.9)           | 9.7 (11.7)        | 9.1 (10.7)  | 8.9 (10.9)           |

Abbreviations: FRO = female reproductive organs
